# Supplementary material for: Mapping regional livelihood benefits from local ecosystem services assessments in rural Sahel
Source: PLOS journal article supplement (doi:10.1371/journal.pone.0192019), 2018-02-01
Supplement: S3 (10.1371/journal.pone.0192019.s003) [file journal.pone.0192019.s003]

## Supporting information for Malmborg et al.

**S1 Table. Specification of raster layers and calculations used for generating livelihood benefit maps.**

|                         |                                        |                                                                                                                                                                                                                                                                                                                   |
|-------------------------|----------------------------------------|-------------------------------------------------------------------------------------------------------------------------------------------------------------------------------------------------------------------------------------------------------------------------------------------------------------------|
| Weight rasters          | Homestead buffer zones                 | 0-500 meters from homestead = weight 1.2<br>500-1000 meters from homestead = weight 1.1<br>1000-2000 meters from homestead = weight 1.0<br>2000-3000 meters from homestead = weight 0.9<br>> 3000 meters from homestead = weight 0.8                                                                              |
|                         | Shrubland area categories              | 0-1 km <sup>2</sup> of shrubland in a village = weight 0.8<br>1-2 km <sup>2</sup> of shrubland in a village = weight 1.2<br>2-3 km <sup>2</sup> of shrubland in a village = weight 1.1<br>3-5 km <sup>2</sup> of shrubland in a village = weight 1.0<br>>5 km <sup>2</sup> of shrubland in a village = weight 0.9 |
| Livelihood benefit maps | Annual crops for consumption           | Depression * 62.4 +<br>Homesteads * 75.2 +<br>Fields * 37.6 * Homestead buffer zone weights                                                                                                                                                                                                                       |
|                         | Nutritional diversity and medical uses | Depression * 23.0 +<br>Homesteads * 23.7 +<br>Fields * 21.3 * Homestead buffer zone weights +<br>Shrubland * 18.5 * Homestead buffer zone weights * Shrubland area weights                                                                                                                                        |
|                         | Material assets and energy             | Depression * 18.1 +<br>Homesteads * 10.4 +<br>Fields * 16.6 * Homestead buffer zone weights +<br>Shrubland * 36.1 * Homestead buffer zone weights * Shrubland area weights +<br>Bare soil * 0.6                                                                                                                   |
|                         | Saving / Insurance                     | Depression * 21.5 +<br>Homesteads * 18.3 +<br>Fields * 23.7 +<br>Shrubland * 18.3 * Shrubland area weights +<br>Bare soil * 2.7                                                                                                                                                                                   |
|                         | Income                                 | Depression * 17.1 +<br>Homesteads * 30.3 +<br>Fields * 31.9 * Homestead buffer zone weights +<br>Shrubland * 9.0 * Homestead buffer zone weights +<br>Bare soil * 0.4                                                                                                                                             |
