# Supplementary material for: Mapping regional livelihood benefits from local ecosystem services assessments in rural Sahel
Source: PLOS journal article supplement (doi:10.1371/journal.pone.0192019), 2018-02-01
Supplement: S8 (10.1371/journal.pone.0192019.s008) [file journal.pone.0192019.s008]

Stockholm January 9, 2017

We hereby accept the open-access journal PLOS ONE to publish Figure 1 in the manuscript PONE-D-16-37790 *Mapping Regional Livelihood Benefits from Local Ecosystem Services Assessments in Rural Sahel* under the Creative Commons Attribution License (CCAL) CC BY 4.0 (<http://creativecommons.org/licenses/by/4.0/>). The figure is a derivative of Figures 3a and 4c in our article Sinare, H., Gordon, L. J, Enfors Kautsky, E. 2016. Assessment of ecosystem services and benefits in village landscapes – A case study from Burkina Faso. *Ecosystem Services* 21: 141-152, to which we are copyright holders.

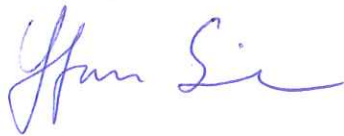

Hanna Sinare



Line Gordon



Elin Enfors Kautsky
